# Supplementary material for: Economic burden of childhood overweight and obesity: A systematic review and meta‐analysis
Source: PubMed Central journal article supplement — Obes Rev. 2022 Nov 27;24(2):e13535. doi: 10.1111/obr.13535 (PMC10078467; doi:10.1111/obr.13535), 2022-11-27
Supplement: OBR-24-0-s001.pdf [file OBR-24-0-s001.pdf]

## Economic Burden of Childhood Overweight and Obesity: A Systematic Review and Meta-Analysis

<sup>a</sup>Jiying Ling, PhD, MS, RN, FAAN; Sisi Chen, PhD, PAPHS; Nagwan R. Zahry, PhD; & Tsui-Sui Annie Kao, PhD, FNP-BC, FAANP

<sup>a</sup>1355 Bogue St., C241, East Lansing, Michigan, US 48824; Phone: 517-353-8591; Email: lingjiyi@msu.edu

**Supplemental Table 1** Summary Table (N=48)

| Author, Year              | Country       | Data (year), Time Frame                                                                                                     | Child Characteristics                                                                                                         | Child Groups                                                                                                            | Costs Included Items                                                                                                                | Main Results on Healthcare Costs                                                                                                                                                                                                                                                                                                                                             |
|---------------------------|---------------|-----------------------------------------------------------------------------------------------------------------------------|-------------------------------------------------------------------------------------------------------------------------------|-------------------------------------------------------------------------------------------------------------------------|-------------------------------------------------------------------------------------------------------------------------------------|------------------------------------------------------------------------------------------------------------------------------------------------------------------------------------------------------------------------------------------------------------------------------------------------------------------------------------------------------------------------------|
| Au et al., 2012           | Australia     | Longitudinal Study of Australian Children (LSAC; 2004, 2006, 2008)<br><br>Over 5 years                                      | N=4335<br><b>Age:</b> 4-5 years<br>51.75% male                                                                                | Non-overweight (3445) vs. overweight (890)                                                                              | Non-hospital medical care and prescribed medication costs                                                                           | <b>Overall healthcare cost difference:</b><br>AUD\$121.35±32.41, 12.92%±3.59%<br><b>Medical care cost difference:</b> \$86.57±31.27, 10%±3.69%<br><b>Medication cost difference:</b> \$34.78±8.81, 58.84%±15.47%<br><br>(In AUD \$, value of 2008)                                                                                                                           |
| Batscheider et al., 2014  | Germany       | GINIplus (1995-1998) and LISApplus (1997-1999), 10-yr follow-up<br><br>Annual                                               | N=3635<br><b>Age:</b> M=10.1 years<br>51.3% male                                                                              | Normal BMI-z growth class 1 (1556) vs. rapid BMI-z growth class 2 (2022) vs. persistent rapid BMI-z growth class 3 (57) | Physician visits, (physical) therapies, number of hospital and inpatient rehabilitation days                                        | <b>Overall direct medical costs:</b> class 1: €362 (95% CI: 314-420, SD=1067); class 2: 363 (95% CI: 316-417, SD=1159); class 3: 722 (95% CI: 420-1070, SD=1252)<br><br>(In Euros €, values of 2007)                                                                                                                                                                         |
| Bettenhausen et al., 2015 | United States | Pediatric Health Information System (PHIS) administrative Database (October 2011-September 2012)<br><br>Per hospitalization | N=518 hospitalized asthma patients<br><b>Age:</b> median=8 (IQR=6-11)<br>59.7% male; 11.4% Hispanic; 23.9% White; 56.9% Black | Healthy weight (310) vs. overweight (88) vs. obesity (102)                                                              | Adjusted billed charges; length of stay                                                                                             | <b>Adjusted bills charges:</b> healthy weight: median \$6876 (IQR5237–9390) [7167.7±3076.3]; overweight: 7056 (5409–9061) [7175.3±2705.2]; obesity: 7198 (5331–9306) [7278.3±2944.4]<br><b>Length of stay (hour):</b> healthy weight: 26 (18–41) [28.67±17.78]; overweight: 26 (19.25–40) [28.42±15.37]; obesity: 31 (19–42) [30.67±17.04]<br><br>(In US \$, values of 2012) |
| Biener et al., 2020       | United States | Medical Expenditure Panel Survey (2001-2015)<br><br>Annual                                                                  | N=40,613<br><b>Age:</b> 11-17 years<br>50.2% male                                                                             | Healthy weight vs. obesity                                                                                              | Total medical expenditures including costs on inpatient care, outpatient visits, prescription drugs, and expenditures by payer type | <b>Annual medical costs per person:</b><br>\$1035.89±3884.77 vs. 1943.27±3884.77<br><b>Total direct costs for 11-17 years-old from 2011-2015:</b> averaged \$7.71 billion per year, \$9.85 billion in 2015, up from \$5.41 billion in 2001<br><br>(In US \$, values of 2015)                                                                                                 |
| Black et al., 2018        | Australia     | Longitudinal Study of Australian Children (2004-2012)                                                                       | N=10804<br><b>Age:</b> 6-13 years                                                                                             | Healthy weight vs. overweight                                                                                           | Non-hospital total Medicare costs                                                                                                   | <b>Total annual Medicare costs per child:</b> healthy weight: AUD\$237.8±4.43SE; overweight: \$267.1±9.37SE; obesity: \$298.7±20.37SE                                                                                                                                                                                                                                        |

|                          |               |                                                                                                                                                                                                                                                                              |                                                                                                                                            |                                                                                   |                                                                                                                                                  |                                                                                                                                                                                                                                                                                                                                                                              |
|--------------------------|---------------|------------------------------------------------------------------------------------------------------------------------------------------------------------------------------------------------------------------------------------------------------------------------------|--------------------------------------------------------------------------------------------------------------------------------------------|-----------------------------------------------------------------------------------|--------------------------------------------------------------------------------------------------------------------------------------------------|------------------------------------------------------------------------------------------------------------------------------------------------------------------------------------------------------------------------------------------------------------------------------------------------------------------------------------------------------------------------------|
|                          |               | 12 months after height/weight measurement                                                                                                                                                                                                                                    |                                                                                                                                            | Healthy weight vs. obesity                                                        |                                                                                                                                                  | <b>Pharmaceutical costs:</b> healthy weight: \$19.64±2.105SE; overweight: \$30.76±7.406SE; obesity: \$39±16.203SE<br><b>Total annual medical costs:</b> \$43 million<br><br>(In AUD \$, values in 2015)                                                                                                                                                                      |
| Booth et al., 2009       | Australia     | Random sample Feb-May 2004<br><br>Annual                                                                                                                                                                                                                                     | N=496<br><b>Age:</b> 15-19 years, M=15.3<br>58.5% male                                                                                     | Healthy weight vs. overweight/obesity                                             | Full-service charges and Medicare expenditures for specialist medical and dietary consultations, pathology tests and radiological investigations | <b>Overweight/obesity vs. healthy weight:</b> 48% increase                                                                                                                                                                                                                                                                                                                   |
| Breitfelder et al., 2011 | Germany       | German Infant Nutritional Intervention study (GINI-plus, September 1995 to July 1998); Influence of life-style factors on the development of the immune system and allergies in East and West Germany study (LISA-plus, November 1997 to January 1999)<br><br>Last 12 months | N=3508 for direct medical costs<br>N=2667 for indirect costs caused by parental work absence<br><br><b>Age:</b> M=10.2 years<br>51.3% male | Healthy weight (3930) vs. overweight (302)<br><br>Healthy weight vs. obesity (96) | Direct medical costs (physician visits, physical therapies, hospital stays, inpatient rehabilitation)<br>Indirect costs (parental work absence)  | <b>Total direct medical costs:</b> healthy weight: €402±3022.54 (95% CI: 321-510); overweight: €468±1436.36 (95% CI: 317-641); obesity: €680±1329.72 (95% CI: 443-975)<br><b>Total indirect costs due to parental work absence:</b> healthy weight: €100 (95%CI: 90-110); overweight: €85 (95%CI: 58-117); obesity: €118 (95%CI: 59-187)<br><br>(In Euros €, values of 2007) |
| Buescher et al., 2008    | United States | North Carolina public health records linked to 2004 North Carolina Medicaid enrollment records<br><br>Annual                                                                                                                                                                 | N=3528<br><b>Age:</b> 12-18 years, 47.7% male; 43.3% White; 52.4% Black                                                                    | Healthy weight (1841) vs. at risk for overweight (619) vs. overweight (1019)      | Average total Medicaid expenditure per child that includes hospital costs, physician costs, and prescription drug costs                          | <b>Average Medicaid expenditures per child:</b> healthy weight: \$3604; at risk for overweight: \$4791 (p=.08); overweight: \$4491 (p=.13)<br><b>Average prescription drug expenditures per child:</b> healthy weight: \$340; at risk for overweight: \$426 (p=.10); overweight: \$483 (p=.01)<br><br>(In US \$, values in 2004)                                             |
| Clifford et al., 2015    | Australian    | Waves 1–4 of the Longitudinal Study of Australian Children                                                                                                                                                                                                                   | Baby cohort: N=5107<br>0–1-year-old; 4606 (90%, 0-1 yr-old), 4386 (86%, 2-3 yr-old)                                                        | Healthy weight vs. overweight vs. obesity                                         | Non-hospital healthcare (Medicare) costs that include healthcare services/attendances                                                            | <b>Total healthcare costs per child [baby cohort]:</b> healthy weight: AUD\$1006±1208, 557±904, 563±823 (n=2835); overweight: 995±2838, 607±1356, 641±2025 (n=728); obesity: 918±3382, 652±3616; 750±3607 (n=244)                                                                                                                                                            |

|                         |               |                                                                                                                 |                                                                                                                                                                                                                                  |                                                                                                        |                                                                                                                                                                                                          |                                                                                                                                                                                                                                                                                                                                                                                            |
|-------------------------|---------------|-----------------------------------------------------------------------------------------------------------------|----------------------------------------------------------------------------------------------------------------------------------------------------------------------------------------------------------------------------------|--------------------------------------------------------------------------------------------------------|----------------------------------------------------------------------------------------------------------------------------------------------------------------------------------------------------------|--------------------------------------------------------------------------------------------------------------------------------------------------------------------------------------------------------------------------------------------------------------------------------------------------------------------------------------------------------------------------------------------|
|                         |               | Over 2 years                                                                                                    | and 4242 (82%, 4-5 yr-old)<br><b>Age:</b> M=0.7<br>51.6% male<br><br>Kindergarten cohort:<br>N=4983 4-5 year-old<br>4464 (90%, 4-5 yr-old), 4331 (87%, 6-7 yr-old) and 4164 (84%, 8-9 yr-old)<br><b>Age:</b> M=4.8<br>51.6% male |                                                                                                        | and prescription medications                                                                                                                                                                             | <b>Total healthcare costs per child [kindergarten cohort]:</b> healthy weight: 470±670, 424±637, 459±751 (n=2778); overweight: 516±1205, 478±1464, 524±1815 (n=706); obesity: 576±3080, 549±4583; 541±3005 (n=283)<br><br>(In AUD \$, values in 2011)                                                                                                                                      |
| Estabrooks et al, 2007  | United States | Kaiser Permanente Colorado child members with BMI measurements (KPCA, 2000-2004)<br><br>Annual                  | N=11,636 members (8455 healthy weight, 1641 overweight, and 1540 obese)<br><b>Age:</b> 3-17 years<br>52.3% male<br>M=10.14                                                                                                       | Healthy weight (8455) vs. overweight (3181)                                                            | Direct and indirect costs for primary care sick visits and mental health visits                                                                                                                          | <b>Additional annual costs for overweight vs. healthy weight:</b> \$42.148/child±340.01 (95% CI: 20.992, 63.140) for primary sick visits and \$31.866/child±497.72 (95% CI: 5.424, 67.122) for mental health visits<br><br><b>Annual costs for healthy weight (median):</b> \$164/child for primary sick visits and \$339/child for mental health visits<br><br>(In US \$, values in 2004) |
| Finkelstein et al, 2008 | United States | Medical Expenditure Panel Survey (MEPS, 2001-2003)<br><br>Annual                                                | N=20,231<br><b>Age:</b> 8-19 years                                                                                                                                                                                               | Healthy weight (11350) vs. overweight (2832) vs. obesity (2812)                                        | Annual per-child medical costs                                                                                                                                                                           | <b>Additional annual costs for overweight vs. healthy weight per child:</b> \$180±89.29 (95% CI: \$30-\$380)<br><br><b>Additional annual costs for obese vs. healthy weight:</b> \$220±107.14 (95% CI: \$30-\$450)<br><br>(In US \$, values of 2006)                                                                                                                                       |
| Hampl et al, 2007       | United States | Sample of patients who had at least 1 well childcare visit at the primary care center (2002-2003)<br><br>Annual | N=8,404<br><b>Age:</b> 5-18 years<br>49.2% male; 61.2% Black; 11.9% Hispanic                                                                                                                                                     | Healthy weight (5063) vs. overweight (1493) vs. diagnosed obesity (793) vs. undiagnosed obesity (1055) | Health care charges: primary care visits; emergency department, inpatient, outpatient primary care, same day surgery, and observation unit stays; and laboratory use on the basis of blood tests ordered | <b>Mean health care charges:</b> healthy weight: \$445±450; overweight: \$473±461; diagnosed obesity: \$617±533; undiagnosed obesity: \$481±439<br><br>(In US \$, values in 2003)                                                                                                                                                                                                          |
| Hayes et al, 2016       | Australia     | Healthy Beginnings Trial (HBT); Medicare                                                                        | N=350<br><b>Age:</b> 2-5 years<br>52% male                                                                                                                                                                                       | Healthy weight (215) vs.                                                                               | Healthcare costs: hospital, nonhospital, emergency, and                                                                                                                                                  | <b>Healthcare costs per child:</b> healthy weight: AUD\$838.67±847.67; overweight: \$869.67±1028.33; obesity: \$1374.67±\$1539.33                                                                                                                                                                                                                                                          |

|                     |               |                                                                                                                                                                                |                                                                                                      |                                                          |                                                                                                                                                         |                                                                                                                                                                                                                                                                                                                                                                                                                                 |
|---------------------|---------------|--------------------------------------------------------------------------------------------------------------------------------------------------------------------------------|------------------------------------------------------------------------------------------------------|----------------------------------------------------------|---------------------------------------------------------------------------------------------------------------------------------------------------------|---------------------------------------------------------------------------------------------------------------------------------------------------------------------------------------------------------------------------------------------------------------------------------------------------------------------------------------------------------------------------------------------------------------------------------|
|                     |               | Benefits Scheme (MBS); Pharmaceutical Benefits Scheme (PBS); New South Wales (NSW) Admitted Patient Data Collection and NSW Emergency Department Data Collection<br><br>Annual |                                                                                                      | overweight (103) vs. obesity (31)                        | medicine use                                                                                                                                            | Healthcare costs of children with obesity were 1.62 (95% CI: 1.12-2.36) times that of children with a healthy weight<br><b>Medicine costs per child:</b> healthy weight: \$30±45.33; overweight: \$27.67±40; obesity: \$46.33±44.67<br><br>(In AUD \$, values in 2014)                                                                                                                                                          |
| Janicke et al, 2009 | United States | State of Florida Agency for Health Care Administration Medicaid database, (2001-2005)<br><br>Over 4 years                                                                      | N=13,688<br><b>Age:</b> 5-18 years, M=10.5±3.0<br>48% male; 25.4% Black; 33.8% Hispanic; 28.7% White | Obesity/morbidly obesity (2354) vs. non-obesity (11334)  | Total medical expenditures of nonpsychiatric health services: outpatient visits, emergency department visits, pharmacy claims, inpatient length of stay | <b>Total expenditures for obesity/morbidity obesity:</b> B=0.059 (95% CI: 0.003-0.114)<br><b>Outpatient expenditures for obesity/morbidity obesity:</b> B=0.235 (95% CI: 0.153-0.318)<br><b>Inpatient expenditures:</b> B=-0.002 (95% CI: -0.148-0.144)<br><b>Pharmacy expenditures:</b> B=-0.171 (95% CI: -0.274-0.068)<br><br>(In US \$, values of 2005)                                                                      |
| Janicke et al, 2010 | United States | Medicaid claims data (before March-December 2007)<br><br>Annual                                                                                                                | N=200<br><b>Age:</b> 7-15 years, M=11.24±0.17<br>52.5% male; 65% Black; 6% Hispanic; 25% White       | Healthy weight (87) vs. overweight (68) vs. obesity (45) | Outpatient and medical/physician expenditures, pharmacy expenditures, and acute care expenditures                                                       | <b>Mean outpatient and medical/physician expenditures:</b> healthy weight: \$1170±1137.94; overweight: \$1069±1162.72; obesity: \$1647±1724.01<br><b>Mean acute care expenditures:</b> healthy weight: \$126±121.26; overweight: \$122±115.45; obesity: \$200±194.54<br><b>Mean pharmacy expenditures:</b> healthy weight: \$1212±2639.65; overweight: \$904±1591.52; obesity: \$1047±2374.70<br><br>(In US \$, values of 2007) |
| Janssen et al, 2009 | Canada        | Canadian Community Health Survey Data Set (CCHS, 2000-2001); Ontario Health Insurance Plan (OHIP, 2002-2003)<br><br>Over 2 years                                               | N=2440<br><b>Age:</b> 12-17 years<br>50.9% male                                                      | Healthy weight (1945) vs. overweight/obesity (495)       | Direct physician costs                                                                                                                                  | <b>Mean physician costs per year:</b> healthy weight: \$233±787.54 (95% CI: 194-264); overweight/obesity: \$233±442.70 (95% CI: 196-274)<br><br>(In Euros \$, values of 2002-2003)                                                                                                                                                                                                                                              |

|                         |               |                                                                                                                                                                                                                                                                               |                                                                            |                                                                              |                                                                                                                                                                                                                                                                      |                                                                                                                                                                                                                                                                                                                                                                                                                                      |
|-------------------------|---------------|-------------------------------------------------------------------------------------------------------------------------------------------------------------------------------------------------------------------------------------------------------------------------------|----------------------------------------------------------------------------|------------------------------------------------------------------------------|----------------------------------------------------------------------------------------------------------------------------------------------------------------------------------------------------------------------------------------------------------------------|--------------------------------------------------------------------------------------------------------------------------------------------------------------------------------------------------------------------------------------------------------------------------------------------------------------------------------------------------------------------------------------------------------------------------------------|
| Jerrell et al, 2009     | United States | Claims data for South Carolina's Medicaid Program (January 1995-December 2004)<br><br>Annual                                                                                                                                                                                  | N=6438<br><b>Age:</b> 0-17 years, M=10.94<br>46% male; 74% Black           | Healthy weight (552) vs. obesity (2943)                                      | Total costs of outpatient visits, emergency visits, inpatient days, and pharmacy claims                                                                                                                                                                              | <b>Total Medicaid health care costs:</b> healthy weight: \$1524.2; obesity: \$2859.6<br><br>(In US \$, values of 2004)                                                                                                                                                                                                                                                                                                               |
| Johnson et al., 2006    | United States | Medical Expenditure Panel Survey (MEPS, 1998)<br><br>Annual                                                                                                                                                                                                                   | N=4898<br><b>Age:</b> 4-17 years M=10.58<br>51.1% male; 16.3% Black; 13.3% | Non-overweight (2620) vs. overweight/obesity (2278)                          | Health expenditures on prescription drug, in-patient and office visits                                                                                                                                                                                               | <b>Medical expenditures per child:</b> non-overweight: \$494.558±2096; overweight/obesity: 488.827±1976<br><br>(In US \$, values of 1998)                                                                                                                                                                                                                                                                                            |
| Kirk et al, 2012        | Canada        | Children's Lifestyle and School Performance Study (CLASS 2003); Administrative health datasets: Medical Services Insurance Database and Canadian Institute for Health Information Discharge Abstract Database Ontario Case Costing Initiative (2001-2006)<br><br>Over 6 years | N=3361<br><b>Age:</b> 10-11 years<br>48% male                              | Healthy weight (2252) vs. overweight (773) vs. obesity (336)                 | Health care utilization on infectious diseases, internalizing disorders, conduct disorder, other mental disorders, asthma, other respiratory disorders, injury, obesity, miscellaneous obesity-related disorders, otitis media, and chronic adenoid/ tonsil disorder | <b>Physician costs for the selected conditions per person per visit:</b> healthy weight: \$358.3; overweight: \$353.6; obesity: \$423.4<br><br><b>Physician costs for obesity per person per visit:</b> healthy weight: 0; overweight: \$2.9; obesity: \$13.6<br><br>(In US \$, values of 2006)                                                                                                                                      |
| Kompaniyets et al, 2020 | United States | NIS (National Inpatient Sample Database; 2006-2016)<br><br>Per hospitalization                                                                                                                                                                                                | N=~4.1 million<br><b>Age:</b> 2-19 years                                   | Healthy weight vs. primary diagnosis obesity vs. secondary diagnosis obesity | Hospitalization length of stay, charges, and costs                                                                                                                                                                                                                   | <b>Obesity as a primary diagnosis vs. healthy weight (mean per hospitalization):</b> 1.8-day lower length of stay (healthy mean 3.8 days); \$20879 higher charges (healthy mean 29333); \$6049 higher costs (healthy mean 9192)<br><b>Obesity as a secondary diagnosis vs. healthy weight (mean per hospitalization):</b> 0.8-day higher length of stay; \$3453 higher charge; \$1359 higher costs<br><br>(In US \$, values in 2016) |
| Kuhle et al, 2011       | Canada        | Children's Lifestyle and School                                                                                                                                                                                                                                               | N=3,399<br><b>Age:</b> 10-11 years<br>48% male                             | Healthy weight (2277) vs.                                                    | Total healthcare costs (physician and hospital costs), and                                                                                                                                                                                                           | <b>Total health care costs (2003-2006, median [25<sup>th</sup>, 75<sup>th</sup> percentile]):</b> healthy weight: CDN\$275 (128, 598), 333.67±348.15;                                                                                                                                                                                                                                                                                |

|                       |               |                                                                                                                                                      |                                                                                                                       |                                                                  |                                                                                                                             |                                                                                                                                                                                                                                                                   |
|-----------------------|---------------|------------------------------------------------------------------------------------------------------------------------------------------------------|-----------------------------------------------------------------------------------------------------------------------|------------------------------------------------------------------|-----------------------------------------------------------------------------------------------------------------------------|-------------------------------------------------------------------------------------------------------------------------------------------------------------------------------------------------------------------------------------------------------------------|
|                       |               | Performance Study (CLASS, 2003), linked to administrative health datasets (2003-2006)<br><br>Over 3 years                                            |                                                                                                                       | overweight (782) vs. obesity (340)                               | lifetime (birth to age 14) physician costs                                                                                  | overweight: 298 (136, 600), 344.67±343.70; obesity: 356 (140, 721), 405.67±430.37<br><b>Lifetime physician costs (1992-2006):</b> healthy weight: 2147 (1428, 3297); overweight: 2309 (1463, 3315); obesity: 2504 (1694, 3725)<br><br>(In CDN \$, values of 2006) |
| Kuhle et al, 2012     | Canada        | Children's Lifestyle and School Performance Study (CLASS; 2003); Administrative health data sets (2003-2006)<br><br>Per physician visit              | N=3,399<br><b>Age:</b> 10-13 years, M=11.1±0.4<br>48.1% male                                                          | Healthy weight (2264) vs. overweight (788) vs. obesity (347)     | Physician visits and costs                                                                                                  | <b>Per capita physician visit costs (mean):</b> healthy weight: CDN\$24; overweight: \$32; obesity: \$47<br><br>(In CDN \$, values of 2006)                                                                                                                       |
| Lightwood et al, 2009 | United States | National Health and Nutrition Examination Survey (1971-1974, 1976-1980, 1988-1994, 1999-2000); Medical Expenditure Panel Survey (MEPS)<br><br>Annual | N=162,000 adult population from 2020-2050<br><b>Age:</b> 12-19 years; 35-64 years (2020-2050)                         | Healthy weight vs. obesity                                       | Direct medical costs and indirect costs resulting from loss of productivity stemming from morbidity and premature mortality | <b>Excess annual direct medical costs:</b> \$130 million in 2020 to \$10 billion in 2050<br><b>Annual indirect costs of lost productivity:</b> \$942 million in 2020 to \$36 billion in 2050<br><br>(In US \$, values of 2007)                                    |
| Monheit et al, 2009   | United States | Medical Expenditure Panel Survey (MEPS-HC; 2001-2003); National Health and Nutrition Examination Survey (NHANES)<br><br>Annual                       | N=6,738<br><b>Age:</b> 12-19 years, female M=15.39±2.24, male M=15.37±2.26<br>51.4% male; 14.6% Hispanic; 13.3% Black | Healthy weight (5781) vs. overweight (957) (separated by gender) | Health expenditures excluding specific health conditions that are associated with overweight                                | <b>Annual health expenditure differences:</b> females: \$790±315; males: no difference<br><b>Mental health expenditure differences:</b> females: \$208±91; males: no difference<br><br>(In US \$, values of 2003)                                                 |
| Nafiu et al., 2008    | United States | Electronic anesthesia record and the charges from billing data from a large tertiary institution                                                     | N=1643 children under Adenotonsillectomy<br><b>Age:</b> 3-18 years M=7.2±3.8                                          | Healthy weight (1306) vs. overweight (215) vs. obesity (122)     | Mean total hospital charges forwarded to the insurance payer, length of stay                                                | <b>Mean hospital charges per child:</b> healthy weight: \$4023.9±2494.8; overweight: 4468.8±3400.9; obesity: 5031.9±2559.4<br><b>Length of stay (day):</b> healthy weight: 0.25±0.64; overweight: 0.39±0.75; obesity: 0.63±0.83                                   |

|                    |               |                                                                                          |                                                                                                                  |                                                                 |                                                                                                                   |                                                                                                                                                                                                                                                                                                                                               |
|--------------------|---------------|------------------------------------------------------------------------------------------|------------------------------------------------------------------------------------------------------------------|-----------------------------------------------------------------|-------------------------------------------------------------------------------------------------------------------|-----------------------------------------------------------------------------------------------------------------------------------------------------------------------------------------------------------------------------------------------------------------------------------------------------------------------------------------------|
|                    |               | (January 2005 and June 2007)                                                             | 55.3% male; 76% White; 11% Black; 5.6% Hispanic                                                                  |                                                                 |                                                                                                                   | (In US \$, values of 2007)                                                                                                                                                                                                                                                                                                                    |
|                    |               | Per hospitalization                                                                      |                                                                                                                  |                                                                 |                                                                                                                   |                                                                                                                                                                                                                                                                                                                                               |
| Okubo et al, 2016  | United States | Kids' Inpatient Database (KID, 2012)                                                     | N=100,157<br><b>Age:</b> 2-18 years, M=6.70±6.7<br>62% male; 21% Hispanic, 34.5% Black, 30% White                | Non-obesity (96573) vs. obesity (3584)                          | Mean total charges and length of stay for inpatient services among patients with acute asthma exacerbations       | <b>Additional mean total charges for inpatient services among obese vs. nonobese children:</b> \$3445±536.99 (95% CI: \$2471-\$4576, p<.001)<br><b>Length of stay:</b> 0.41±0.04 days (95% CI: 0.33-0.49, p<.001)<br><br>(In US \$, values of 2012)                                                                                           |
| Okubo et al, 2017A | United States | Kids' Inpatient Database (KID, 2012)                                                     | N=51,918<br><b>Age:</b> <18 years<br>86.9% male; 46% White; 13.5% Black; 25.9% Hispanic; 2.2% Asian; 12.4% other | Non-obesity (51918) vs. obesity (1488)                          | Total hospitalization costs and length of stay among patients with urinary tract infection                        | <b>Hospitalization costs:</b> non-obesity: \$6033±11980; obesity: \$7785±12763; 1.29 times greater cost (95% CI: 1.13-1.47)<br><b>Total length of stay (day):</b> non-obesity: 3.54±4.92; obesity: 4.57±6.93; 1.29 times greater cost (95% CI: 1.16-1.44)<br><br>(In US \$, value of 2012)                                                    |
| Okubo et al, 2017B | Japan         | Diagnosis Procedure Combination inpatient database (July 1, 2010 and March 31, 2015)     | N=38,679<br><b>Age:</b> 3-8 years, M=6.53±0.03<br>59% male                                                       | Healthy weight (28904) vs. overweight (3334) vs. obesity (3264) | Total hospitalization costs and length of stay among patients with acute asthma exacerbations                     | <b>Total costs:</b> healthy weight: 29320; overweight: 29751 (difference 431±572.19); obesity: 30121 (difference 802±602.55)<br><b>Total length of stay (day):</b> healthy weight: 5.21; overweight: 5.13 (difference -0.08±0.04); obesity: 5.30 (difference 0.09±0.03)<br><br>(In Japanese yen, values of 2015)                              |
| Okubo et al, 2018A | Japan         | Diagnosis Procedure Combination inpatient database (DPC; July 1, 2010 to March 31, 2015) | N=27,771<br><b>Age:</b> 3-8 years, M=5.13±0.30<br>57.2% male                                                     | Healthy weight (19701) vs. overweight (2675) vs. obesity (2785) | Total hospitalization costs and total length of stay among patients with influenza-related respiratory infections | <b>Total costs in US \$ (mean):</b> healthy weight: \$276; overweight: \$262 (difference -13.7±5.10); obesity: \$267 (difference -8.4±5.18)<br><b>Total length of stay (day):</b> healthy weight: 4.32; overweight: 4.28 (difference -0.04±0.05); obesity: 4.32 (difference -0.01±0.05)<br><br>(In US \$, 100 Japanese yen per US \$ in 2015) |
| Okubo et al, 2018B | Japan         | Diagnosis Procedure Combination inpatient database (DPC, July 1, 2010 to March 31, 2015) | N=42,698<br><b>Age:</b> 3-8 years, M=5.16±0.06<br>56.2% male                                                     | Healthy weight (35849) vs. overweight/obesity (3152)            | Total hospital costs and length of stay among patients with diagnoses of bronchitis/pneumonia and RSV infection   | <b>Total costs (mean):</b> healthy weight: 16983; overweight/obesity: 17145 (difference 162±159.95)<br><b>Total length of stay (day):</b> healthy weight: 5.84; overweight/obesity: 5.80 (difference -0.04±0.04)<br><br>(In Japanese yen, values of 2015)                                                                                     |
| Okubo et al, 2018C | United States | Kids Inpatient Database (KID;                                                            | N=133,602<br><b>Age:</b> 2-20 years, M=5.64±0.05                                                                 | Non-obesity (132092) vs. obesity (1510)                         | Total healthcare costs and length of stay among patients with                                                     | <b>Total healthcare costs (mean):</b> non-obesity: \$3433; obesity: \$3653; crude difference: \$1231±112.76 (95% CI: 1016, 1458)                                                                                                                                                                                                              |

|                       |               |                                                                                                                                                   |                                                                                                                                               |                                                                 |                                                                                                                                                                                |                                                                                                                                                                                                                                                                                                                                                                                                                                                               |
|-----------------------|---------------|---------------------------------------------------------------------------------------------------------------------------------------------------|-----------------------------------------------------------------------------------------------------------------------------------------------|-----------------------------------------------------------------|--------------------------------------------------------------------------------------------------------------------------------------------------------------------------------|---------------------------------------------------------------------------------------------------------------------------------------------------------------------------------------------------------------------------------------------------------------------------------------------------------------------------------------------------------------------------------------------------------------------------------------------------------------|
|                       |               | 2003, 2006, 2009, and 2012)<br>Per hospitalization                                                                                                | 54% male; 40.6% White; 12.1% Black; 21.5% Hispanic; 1.7% Asian; 24.2% other                                                                   |                                                                 | pneumonia and bronchitis                                                                                                                                                       | <b>Total length of stay (day):</b> non-obesity: 2.53; obesity: 2.65; crude difference: 0.51±0.06 (95% CI: 0.39, 0.63)<br><br>(In US \$, values of 2012)                                                                                                                                                                                                                                                                                                       |
| Ramsey et al, 2020    | United States | Pediatric admissions at Kapi'olani Medical Center for Women and Children (KMCWC; May 1, 2009- January 31, 2012)<br><br>Per hospitalization        | N=730 eligible<br><b>Age:</b> 2-18 years<br>57% male; 15% Asian, 13% Filipino; 22% Hawaiian; 9% other Pacific Islander; 11% Samoan; 12% White | Healthy weight (432) vs. overweight (90) vs. obesity (130)      | Hospital costs among pediatric patients                                                                                                                                        | <b>Additional hospital costs compared to healthy weight:</b> overweight: -0.4% (95% CI: -14-13%); obesity: 19% (95% CI: 7-31%, difference \$1015±446.68 (95% CI: \$144-1895)<br><br>(In US \$, values of 2012)                                                                                                                                                                                                                                                |
| Sonntag et al, 2016   | Germany       | German Interview and Examination Survey for Children (KiGGS); Microcensus data from German Federal Statistical Office (2009)<br><br>Over lifespan | N=14,747<br><b>Age:</b> 0-17 years                                                                                                            | Healthy weight vs. obesity                                      | Lifetime excess costs as difference between 1) the expected lifetime indirect costs for children with overweight/obesity and 2) the same costs for children with normal weight | <b>Excess lifetime costs for obese vs. non-obese females:</b> €6441 (range: 2489-12253)<br><b>Excess lifetime costs for obese vs. non-obese males:</b> €11557 (range: 4011-23660)<br><br>(In Euros €, values of 2010)                                                                                                                                                                                                                                         |
| Thavamani et al, 2020 | United States | Healthcare Cost and utilization Project Kids Inpatient Database (HCUP-KID; 2003-2016)<br><br>Per hospitalization                                  | N=36,698<br><b>Age:</b> 0-20 years, M=15.17±4.73<br>41% male; 44.2% Caucasian; 10.2% Black; 22.4% Hispanic; 23.2% other                       | Morbid obesity (1273) vs. without morbid obesity (35425)        | Healthcare resource utilization including total hospital costs and length of stay among patients with acute pancreatitis                                                       | <b>Total hospital costs:</b> without morbid obesity: \$9983±21268; with morbid obesity: \$12194±19603; difference: \$1596±631.38 (95% CI: 359-2834)<br><b>Total length of stay (day):</b> without morbid obesity: 5.01±5.65; with morbid obesity: 5.54±6.07; difference: 0.41±0.19 (95% CI: 0.04-0.79)<br><br>(In US \$, values of 2016)                                                                                                                      |
| Trasande et al, 2009A | United States | Medical Expenditure Panel Survey (MEPS; 2002-2005)<br><br>Over 2 years                                                                            | N=19,613<br><b>Age:</b> 6-19 years<br>51.28% male; 17.93% Hispanic; 15.09% Black; 3.76% Asian; 63.20% others including whites                 | Healthy weight (10835) vs. overweight (4083) vs. obesity (4695) | Expenditures of outpatient visit, prescription drug, and emergency room                                                                                                        | <b>Additional expenditures of obesity vs. healthy weight:</b> outpatient visits: \$194±56.63 (97.5% CI: \$116-338; 32.2% higher); prescription drugs: \$114±37.76 (97.5% CI: \$34-182; 35% higher); emergency room: \$12±7.40 (97.5% CI: \$3-32; 9.6% higher)<br><b>Additional expenditures of overweight vs. healthy weight:</b> outpatient visits: \$79±34.69 (97.5% CI: \$27-163; 13.1% higher); prescription drugs: \$64±66.33 (97.5% CI: \$11-271; 19.5% |



|                       |               |                                                                                                                                                                                 |                                                                                                                            |                                                                 |                                                                                                                                                                                                                       |                                                                                                                                                                                                                                                                                                                                                                                                                                                                                                                                                                                                                                                                                                             |
|-----------------------|---------------|---------------------------------------------------------------------------------------------------------------------------------------------------------------------------------|----------------------------------------------------------------------------------------------------------------------------|-----------------------------------------------------------------|-----------------------------------------------------------------------------------------------------------------------------------------------------------------------------------------------------------------------|-------------------------------------------------------------------------------------------------------------------------------------------------------------------------------------------------------------------------------------------------------------------------------------------------------------------------------------------------------------------------------------------------------------------------------------------------------------------------------------------------------------------------------------------------------------------------------------------------------------------------------------------------------------------------------------------------------------|
|                       |               |                                                                                                                                                                                 |                                                                                                                            |                                                                 |                                                                                                                                                                                                                       | higher); emergency room: \$25±34.44 (97.5% CI: \$13-148; 19.9% higher)<br><br>(In US \$, values in 2005)                                                                                                                                                                                                                                                                                                                                                                                                                                                                                                                                                                                                    |
| Trasande et al, 2009B | United States | Nationwide Inpatient Sample (NIS; 1999-2005)<br><br>Per hospitalization                                                                                                         | N=3.1 million<br><b>Age:</b> 2-19 years                                                                                    | Healthy weight vs. secondary diagnosis of obesity               | Total costs and charges of hospitalizations, length of stay                                                                                                                                                           | <b>Increase in costs of hospitalizations:</b> difference \$727±153.06 (95%CI: 468, 1068)<br><b>Length of stay:</b> difference 0.85±0.06 (95% CI: 0.74, 0.97)<br><br>(In US \$, values in 2005)                                                                                                                                                                                                                                                                                                                                                                                                                                                                                                              |
| Trasande et al., 2010 | United States | National Health and Nutrition Examination Survey (NHANES, 2003-2006); Nationwide Inpatient Sample (NIS, 2005); Medical Expenditure Panel Survey (MEPS, 2001-2005)<br><br>Annual | N=1,332,063<br><b>Age:</b> 12 years<br>51.2% male                                                                          | Overweight vs. obesity                                          | Direct medical expenditures (outpatient, prescription drugs, hospitalization)                                                                                                                                         | <b>Direct medical expenditures in childhood:</b> overweight: male \$700.5 million, female \$667.3 million; obesity: male \$717.8 million, female \$683.8 million<br><b>Direct medical expenditures in adulthood attributable to childhood obesity:</b> overweight: male \$275.1 million, female \$349.5 million; obesity: male \$1.25 billion, female \$1.60 billion<br><b>Total medical expenditures in childhood and adulthood:</b> \$6.24 billion<br>1% obesity reduction save \$260.4 million in direct medical expenditures: \$86 million in childhood, and \$174.4 million in adulthood<br><b>Medical expenditures per child:</b> overweight: \$363; obesity: \$356<br><br>(In US \$, values in 2005) |
| Turer et al, 2013     | United States | Medical Expenditure Panel Survey (MEPS, 2005-2009)<br><br>Annual                                                                                                                | N=17,224<br><b>Age:</b> 10-17 years, M=14.21±0.04<br>48.25% male; 14.31% Black; 17.15% Hispanic; 56.76% White; 6.94% other | Healthy weight (11540) vs. overweight (2928) vs. obesity (2756) | Annual total health care expenditures including out-of-pocket and insurance payments for office-based and ED visits, inpatient care, outpatient prescriptions, and home health care; total out-of-pocket expenditures | <b>Mean out-of-pocket expenditures:</b> healthy weight: \$485; overweight/obesity: \$352.<br>Overweight: OR=1.0 (95% CI: 0.9-1.0); obesity: OR=0.99 (95% CI: 0.98-1.0)<br><b>Mean total expenditures:</b> healthy weight: \$1780; overweight: \$1920; obesity: \$1740.<br>Overweight: OR=1.0 (95% CI: 0.9-1.0); obesity: OR=0.98 (95% CI: 0.96-1.0)<br><br>(In US \$, values of 2009)                                                                                                                                                                                                                                                                                                                       |
| Vellinga et al., 2008 | Ireland       | Hospital In-Patient Enquiry (HIPE, 1997-2004)                                                                                                                                   | N=680,238 in 1997 to 984,137 in 2004<br><b>Age:</b> 6-18 years                                                             | Obesity                                                         | Average hospital cost per day (health care worker supplies, patient care supplies, diagnostic and therapeutic                                                                                                         | <b>Hospital costs per child per day related to obesity:</b> €388 in 1997; €401 in 1998; €407 in 1999; €432 in 2000; €477 in 2001; €497 in 2002; €520 in 2003; €538 in 2004<br><br>(In Euros €, values of 2004)                                                                                                                                                                                                                                                                                                                                                                                                                                                                                              |

|                   |               |                                                                                                                     |                                                                                                        |                                                                |                                                                                      |                                                                                                                                                                                                                                                                                                                                                                                                                                                                                                                                                                |
|-------------------|---------------|---------------------------------------------------------------------------------------------------------------------|--------------------------------------------------------------------------------------------------------|----------------------------------------------------------------|--------------------------------------------------------------------------------------|----------------------------------------------------------------------------------------------------------------------------------------------------------------------------------------------------------------------------------------------------------------------------------------------------------------------------------------------------------------------------------------------------------------------------------------------------------------------------------------------------------------------------------------------------------------|
|                   |               |                                                                                                                     |                                                                                                        |                                                                | supplies and medication)                                                             |                                                                                                                                                                                                                                                                                                                                                                                                                                                                                                                                                                |
| Wang et al, 2002  | United States | National Hospital Discharge Survey (NHDS, 1979-1999)<br><br>Annual                                                  | N=72,826<br><b>Age:</b> 6-17 years                                                                     | Healthy weight vs. obesity                                     | Annual hospital costs=total number of hospital stays * average hospital cost per day | <b>Annual hospital costs associated with obesity:</b> \$35.10 million (0.43% of total hospital costs) in 1979-1981 to \$127.44 million (1.70% of total hospital costs) in 1997-1999<br><br>(In US \$, values of 2001)                                                                                                                                                                                                                                                                                                                                          |
| Wang et al, 2010  | United States | National Medical Expenditure Panel Survey (MEPS, 2000); National Longitudinal Study of Youth (1979)<br><br>Lifetime | N=8,056,855 (4.2 million males & 3.9 million females)<br><b>Age:</b> 16-17 years in 2000<br>51.6% male | Non-overweight vs. overweight vs. obesity                      | Lifetime medical costs=mean annual medical costs * life expectancy after age 40      | <b>Lifetime medical costs saved after age 40 for males as a result of 1% point prevalence reduction in adolescence:</b> non-overweight: \$43896; overweight: \$39846; obesity: \$54203<br><b>Lifetime medical costs saved after age 40 for females as a result of 1% point prevalence reduction in adolescence:</b> non-overweight: \$43120; overweight: \$43474; obesity: \$52646<br><b>Lifetime medical cost decrease due to a 1% reduction in overweight/obese adolescents in 2000:</b> \$586.3 million (\$73 per capita)<br><br>(In US \$, values of 2007) |
| Ward et al., 2021 | United States | Medical Expenditure Panel Survey (MEPS, 2011-2016)                                                                  | N=36,583<br><b>Age:</b> 6-19 years, M=13.12±3.91; 51.08% male; 21.11% Hispanic, 14.23% Black           | Healthy weight vs. overweight vs. obesity                      | Total annual medical expenditures                                                    | <b>Annual medical expenditures per person:</b> healthy weight: \$1873 (95% CI: 1821-1925); overweight: \$1852 (95% CI: 1794-1916); obesity: \$2183 (2013-2327)<br><br>(In US \$, values of 2019)                                                                                                                                                                                                                                                                                                                                                               |
| Wenig et al, 2011 | Germany       | German Interview and Examination Survey for Children and Adolescents (KiGGS, May 2003-May 2006)                     | N=14,836<br><b>Age:</b> 3-17 years, M=10.9±3.62<br>51.4% male; 17.3% migrant; 82.7% non-migrant        | Healthy weight (11357) vs. overweight (1306) vs. obesity (897) | Pharmaceutical costs                                                                 | <b>Weekly mean pharmaceutical costs:</b> healthy weight: €3.27 (95%CI: 3.03-3.54); overweight: €3.31 (95%CI: 2.75-3.95); obesity: €4.06 (95%CI: 2.98-5.60)<br><b>Mean pharmaceutical costs per year:</b> healthy weight: €170±706.84 (95%CI: 158-184); overweight: €172±571.58 (95%CI: 143-205); obesity: €211±1039.08 (95%CI: 155-291)<br><br>(In Euros €, values of 2006)                                                                                                                                                                                    |
| Wenig et al, 2012 | Germany       | German Interview and Examination Survey for Children and Adolescents (KiGGS, May2003- May 2006)                     | N=14,836<br><b>Age:</b> 3-17.98 years, M=10.87±4.87<br>51.31% male                                     | Healthy weight (11478) vs. overweight (1321) vs. obesity (904) | Total medical costs (physician visits, physical therapy, hospitalizations)           | <b>Annual medical costs per person:</b> healthy weight: €438±2733.05 (95%CI: 392-492); overweight: €540±2512.67 (95%CI: 417-688); obesity: €443±1265.56 (95%CI: 366-531)<br><br>(In Euros €, valued in 2006)                                                                                                                                                                                                                                                                                                                                                   |

|                       |               |                                                                                                         |                                                                                                                            |                                                                                                |                                                                                                                                                                                                         |                                                                                                                                                                                                                                                                                                                                                                                                                                                                                                                                                                                                                                                                                                                                                                                                                                  |
|-----------------------|---------------|---------------------------------------------------------------------------------------------------------|----------------------------------------------------------------------------------------------------------------------------|------------------------------------------------------------------------------------------------|---------------------------------------------------------------------------------------------------------------------------------------------------------------------------------------------------------|----------------------------------------------------------------------------------------------------------------------------------------------------------------------------------------------------------------------------------------------------------------------------------------------------------------------------------------------------------------------------------------------------------------------------------------------------------------------------------------------------------------------------------------------------------------------------------------------------------------------------------------------------------------------------------------------------------------------------------------------------------------------------------------------------------------------------------|
|                       |               | Annual                                                                                                  |                                                                                                                            |                                                                                                |                                                                                                                                                                                                         |                                                                                                                                                                                                                                                                                                                                                                                                                                                                                                                                                                                                                                                                                                                                                                                                                                  |
| Wijga et al, 2018     | Netherlands   | Dutch Prevention and Incidence of Asthma and Mite Allergy birth cohort (PIAMA, 1996-1997)<br><br>Annual | N=1,333<br><b>Age:</b> 14-15 years                                                                                         | Non-overweight (1253) vs. overweight (80)                                                      | Total annual healthcare expenditures (mental healthcare, specialist/hospital care, allied healthcare, prescribed medication, dental care, general practice care)                                        | <b>Costs of general practice per child:</b> non-overweight: €102±42; overweight: €110±61<br><b>Costs of dental care per child:</b> non-overweight: €132±112; overweight: €130±102<br><b>Costs of mental healthcare per child:</b> non-overweight: €1389±1602; overweight: €1528±1992<br><b>Costs of hospital/specialist per child:</b> non-overweight: €448±756; overweight: €498±654<br><b>Costs for allied healthcare per child:</b> non-overweight: €258±204; overweight: €337±292<br><b>Costs for prescribed medication per child:</b> non-overweight: €128±436; overweight: €103±152<br><b>Total expenditures per child:</b> non-overweight: €616±915; overweight: €837±1,213<br><br>(In Euros €, values of 2001)                                                                                                           |
| Woolford et al, 2007  | United States | Healthcare Cost and Utilization Project Kids' Inpatient Database (KID, 2000)<br><br>Per hospitalization | N=774,274<br><b>Age:</b> 2-18 years<br>53.7% male; 50.85% White; 14.37% Black; 14.31% Hispanic; 5.59% other; 14.88%        | Obesity as a secondary diagnosis (8696) vs. without obesity as a secondary diagnosis (762,407) | Total charges and length of stay for each common non-pregnancy-related principal discharge diagnosis: asthma, pneumonia, affective disorders, appendicitis (All hospital fees except professional fees) | <b>Mean charges:</b> Asthma (n=116307): obesity vs. non-obesity (\$7766 vs. 6043, difference=1723, p=.012); Pneumonia (n=90056): obesity vs. non-obesity (\$12228 vs. 9688, difference=2540, p=.016); Affective Disorders (n=8292): obesity vs. non-obesity (\$8292 vs. 7769, difference=523, p=.001); Appendicitis (n=14134): obesity vs. non-obesity (\$14134 vs. 11049, difference=3085, p=.005)<br><b>Length of stay:</b> Asthma (n=116307): obesity vs. non-obesity (3.04 vs. 2.45, difference=0.6, p<.001); Pneumonia (n=90056): obesity vs. non-obesity (4.26 vs. 3.89, difference=0.4, p=.064); Affective Disorders (n=8292): obesity vs. non-obesity (7.72 vs. 7.11, difference=0.6, p=.001); Appendicitis (n=14134): obesity vs. non-obesity (3.33 vs. 3.16, difference=0.2, p=.187)<br><br>(In US \$, values of 2000) |
| Woodford et al., 2009 | United States | Agency for Healthcare Research and Quality                                                              | N=771,103 in 2000 and 958728 in 2003<br><b>Age:</b> 2-18 years<br>53.48% male; 44.39% White; 13.46% Black; 14.38% Hispanic | Non-obesity (762,407 in 2000, 943,182 in 2003) vs. obesity (8,696 in 2000, 15,546 in 2003)     | Hospital charges and length of stay                                                                                                                                                                     | <b>Hospital mean charges:</b> Asthma (non-obesity: \$6884 in 2000 and 8444 in 2003; obesity: 8847 in 2000 and 10589 in 2003); Pneumonia (non-obesity: 11036 in 2000 and 13219 in 2003; obesity: 13930 in 2000 and 16609 in 2003); Affective disorder (non-obesity: 8850 in 2000                                                                                                                                                                                                                                                                                                                                                                                                                                                                                                                                                  |

|                    |               |                                                                                            |                                    |                                                                 |                                                                                                                                                      |                                                                                                                                                                                                                                                                                                                                                                                                                                                                                                                                                                                                                                                          |
|--------------------|---------------|--------------------------------------------------------------------------------------------|------------------------------------|-----------------------------------------------------------------|------------------------------------------------------------------------------------------------------------------------------------------------------|----------------------------------------------------------------------------------------------------------------------------------------------------------------------------------------------------------------------------------------------------------------------------------------------------------------------------------------------------------------------------------------------------------------------------------------------------------------------------------------------------------------------------------------------------------------------------------------------------------------------------------------------------------|
|                    |               | (AHRQ) Kids Inpatient Database (KID, 2000-2003)<br><br>Per hospitalization                 |                                    |                                                                 |                                                                                                                                                      | and 10619 in 2003; obesity: 9446 in 2000 and 11942 in 2003); Appendicitis (non-obesity: 12587 in 2000 and 15586 in 2003; obesity: 16101 in 2000 and 19213 in 2003)<br><b>Length of stay (day):</b> Asthma (non-obesity: 2.45 in 2000 and 2.44 in 2003; obesity: 3.04 in 2000 and 2.88 in 2003); Pneumonia (non-obesity: 3.89 in 2000 and 3.83 in 2003; obesity: 4.26 in 2000 and 4.39 in 2003); Affective disorder (non-obesity: 7.11 in 2000 and 7.42 in 2003; obesity: 7.72 in 2000 and 8.23 in 2003); Appendicitis (non-obesity: 3.16 in 2000 and 3.08 in 2003; obesity: 3.33 in 2000 and 3.91 in 2003)<br><br>(In US \$, values of 2000, 2003)       |
| Wright et al, 2014 | United States | US Medical Expenditure Panel Survey Household Component (MEPS-HC, 2006-2010)<br><br>Annual | N=23,727<br><b>Age:</b> 6-17 years | Healthy weight (15280) vs. overweight (4105) vs. obesity (4389) | Total medical expenditures (office-based, hospital inpatient, hospital outpatient, emergency room, prescription drug, dental visit, home healthcare) | <b>Annual medical expenditure differences:</b><br><b>children:</b> male: overweight vs. healthy weight \$87±219.13 (95%CI: -278-581); obesity vs. healthy weight \$30±109.18 (95%CI: -157-271). Female: overweight vs. healthy weight \$90±220.92 (95%CI: -280-586); obesity vs. healthy weight \$33±110.97 (95%CI: -156-279).<br><b>adolescents:</b> male: overweight vs. healthy weight \$202±182.91 (95%CI: -122-595); obesity vs. healthy weight \$512±303.32 (95%CI: -28-1,161). Female: overweight vs. healthy weight \$215±184.18 (95%CI: -97-625); obesity vs. healthy weight \$515±301.79 (95%CI: -30-1,153).<br><br>(In US \$, values in 2012) |
